# Supplementary material
Source: Research Square preprint supplement (doi:10.21203/rs.3.rs-10001998/v1)
Supplement: Supplementary file 1 [file f92b306b2c8f940cad136dcc.docx]

Additional file 1 Interview outline

| Interview Questions |
| --- |
| 1. Could you tell me a little about what your typical day is like? How do you feel about managing your daily life? |
| 2. How did you find out about this canteen? Do you know anything about the subsidy policies for the canteen? |
| 3. What made you decide to eat at the canteen? |
| 4. What do you think of the location of the canteen? |
| 5. What are your usual mealtimes? Approximately how much do you spend on a single meal, and what is your daily food budget? |
| 6. What do you think of the pricing of the canteen meals? Do government subsidies affect you? |
| 7. Do you usually pay attention to healthy eating and balanced nutrition? What kind of diet do you think is most important for good health? |
| 8. When you eat at the canteen, how do you decide what dishes to choose? |
| 9. Given that we seniors may have some common chronic conditions, how do you think the canteen is doing in terms of meal preparation—specifically, controlling the use of oil, salt, and sugar?  10. If the canteen offered “specialised meal options” (such as diabetic meals or low-sodium meals), would you find them useful? Why?  11. Since you started eating at the canteen, have there been any changes in your life, health, or other aspects?  12. During your meal, what did you find inconvenient?  13. What do you like most about the canteen? If you could suggest just one thing to improve, what would it be?  14. Apart from meals, do you think the canteen should provide nutritional guidance or other additional services?  15. Apart from satisfying your hunger, what else do you think you gain from eating here?  16. What are your expectations for the government and community regarding the canteen’s development? |
